# Supplementary material
Source: publisher figshare collection journal article supplement (https://acs.figshare.com/ndownloader/files/4530289)
Supplement: Supplementary file 1 [file 4530289]

## **Supporting Information**

### **Structural Flexibility enhances the Reactivity of the Bioremediator**

#### **Glycerophosphodiesterase**

#### **by Fine-Tuning its Mechanism of Hydrolysis**

Kieran S. Hadler,<sup>a</sup> Nataša Mitić,<sup>a</sup> Fernanda Ely,<sup>a</sup> Graeme R. Hanson,<sup>b</sup> Lawrence R. Gahan,<sup>a</sup>  
James A. Larrabee,<sup>c</sup> David L. Ollis,<sup>d</sup> Gerhard Schenk<sup>a\*</sup>

<sup>a</sup>School of Chemistry and Molecular Biosciences, The University of Queensland, St Lucia, Queensland, 4072, Australia; <sup>b</sup>Centre for Magnetic Resonance, The University of Queensland, St Lucia, Queensland, 4072, Australia; <sup>c</sup>Department of Chemistry and Biochemistry, Middlebury College, Middlebury, VT, 05753, USA; <sup>d</sup>Research School of Chemistry, Australian National University, Canberra, ACT, 0200, Australia;.

Address for correspondence:

School of Chemistry and Molecular Biosciences

University of Queensland

St Lucia, Queensland, 4072

Australia

Phone: +61 7 3365 4144

Fax: +61 7 3365 4299

Email: [schenk@uq.edu.au](mailto:schenk@uq.edu.au)

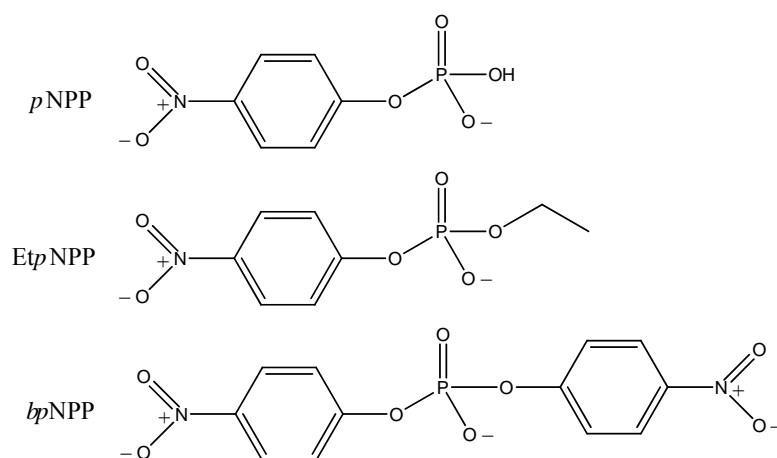

**Figure S1.** Chemical structures of the substrates *p*-nitrophenyl phosphate (*p*NPP), ethyl *p*-nitrophenyl phosphate (EtpNPP), and *bis*(*p*-nitrophenyl) phosphate (*bp*NPP).

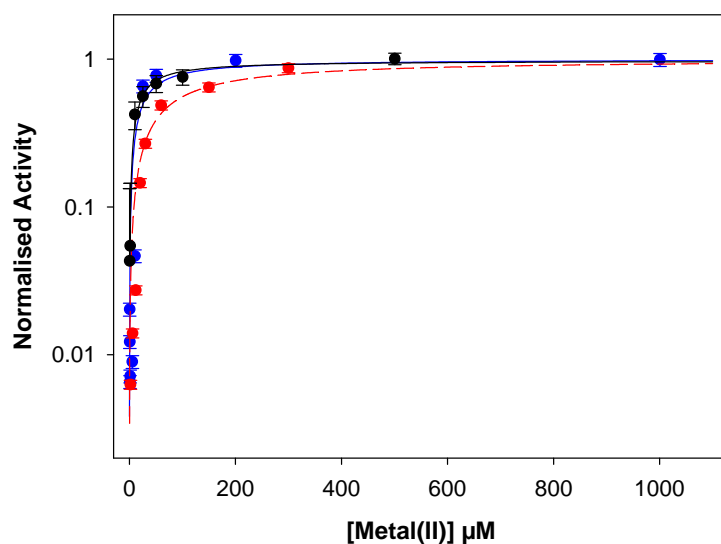

**Figure S2.** Determination of metal binding to GpdQ by measuring activity (using 5 mM *bp*NPP) as a function of added Co(II), Mn(II), or Cd(II) (blue, red, and black, respectively). The data were fit to the following equations as described elsewhere:<sup>10</sup>

$$r = \frac{n[M]_{free}}{K_d + [M]_{free}} \quad (S1)$$

where  $r$  is the binding function,  $n$  is the number of sites associated with  $K_d$ , and  $[M]_{free}$  is the free metal ion concentration.  $[M]_{free}$  was calculated from eq. S2, where  $[M]_{total}$  is the total concentration of metal ions added, and  $[E]$  is the concentration of enzyme.

$$[M]_{free} = [M]_{total} - r[E] \quad (S2)$$

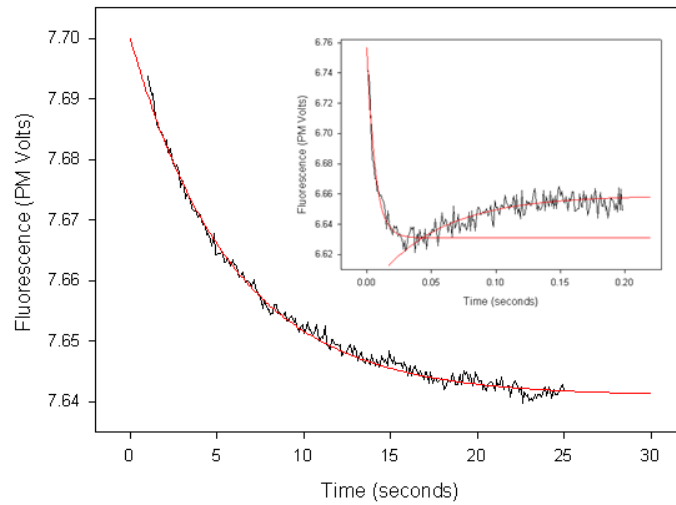

**Figure S3.** Sample progress curves showing the three fluorescence transient phases of the reaction between GpdQ and the substrate *p*NPP. *Main figure:* 5  $\mu$ M GpdQ was reacted with 50.0  $\mu$ M *p*NPP, and the progress was monitored over 25 s. *Inset:* 5  $\mu$ M GpdQ was reacted with 500  $\mu$ M *p*NPP, and fluorescence changes were monitored over 200 ms.

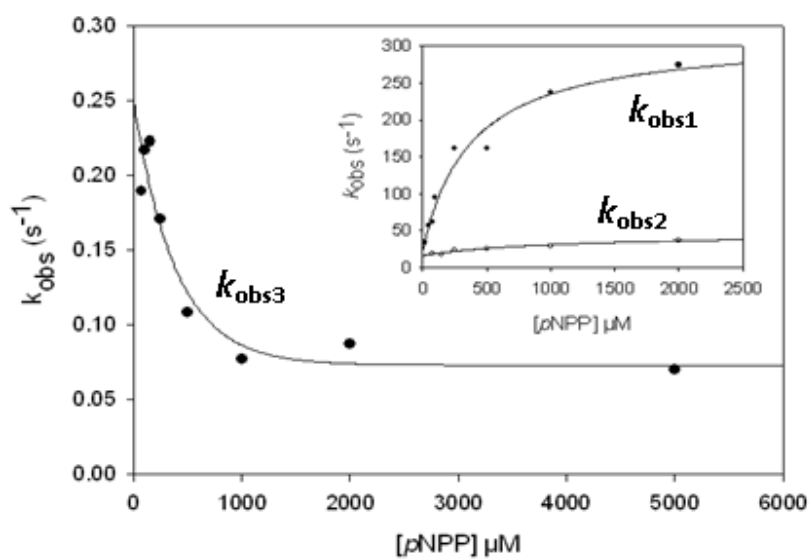

**Figure S4.** Effect of the concentration ([S]) of *p*NPP on the observed rates ( $k_{\text{obs}}$ ) associated with the three fluorescence transients. The data were fit to equations described in the text.

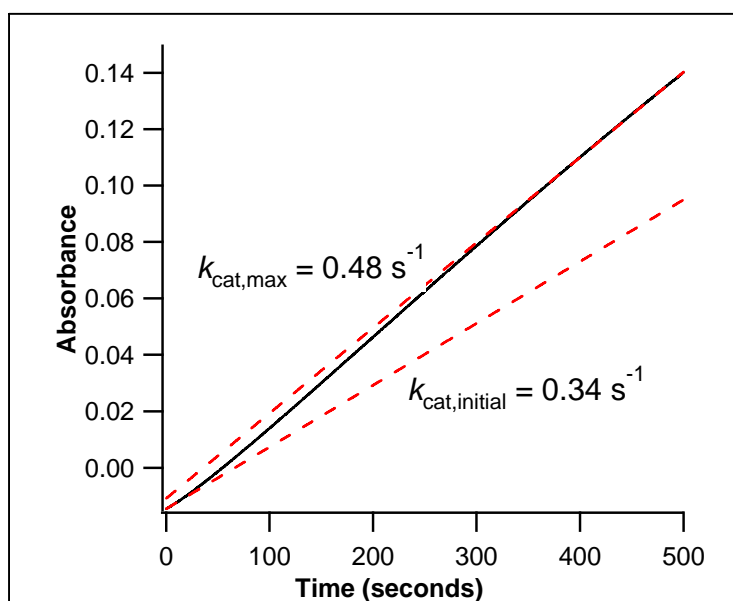

**Figure S5.** Example of the absorbance change measured over time for the reaction of GpdQ and *bp*NPP (5 mM). Note that the initial rate ( $k_{\text{cat}} = 0.34 \text{ s}^{-1}$ ) increases to the maximal rate ( $k_{\text{cat,max}} = 0.48 \text{ s}^{-1}$ ) after 500 seconds.

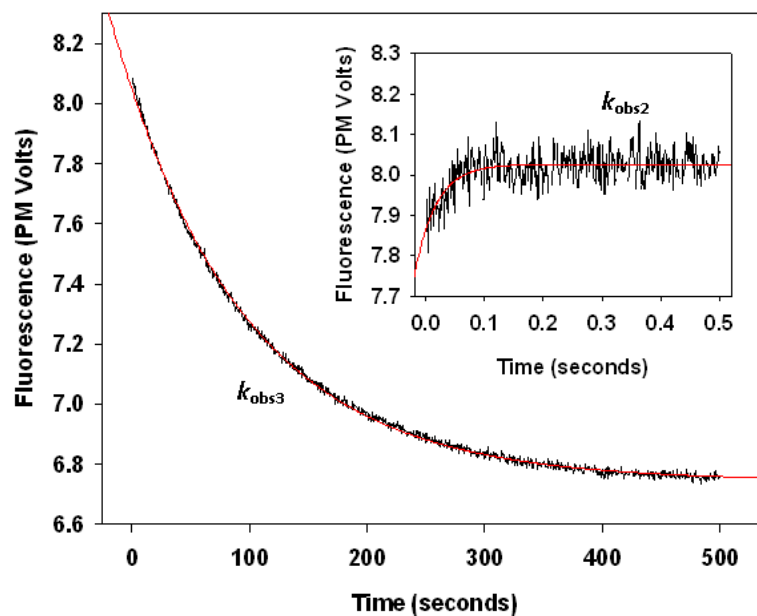

**Figure S6.** Reaction progress curves showing the changes in fluorescence during the reaction between N80A-GpdQ and the substrate *bpNPP*. *Main figure:* 1  $\mu$ M N80A-GpdQ was reacted with 1.1 mM *bpNPP* and the progress was monitored over 500 s. The fitted  $k_{obs3}$  value was  $0.540 \pm 0.001 \text{ min}^{-1}$  (c.f.  $k_{obs3} = 3.9 \pm 0.1 \text{ min}^{-1}$  for the wild type enzyme under identical conditions). *Inset:* 1  $\mu$ M N80A-GpdQ was reacted with 120  $\mu$ M *bpNPP* and fluorescence changes were monitored over 500 ms. The fitted  $k_{obs2}$  value was  $28 \pm 3 \text{ s}^{-1}$ .

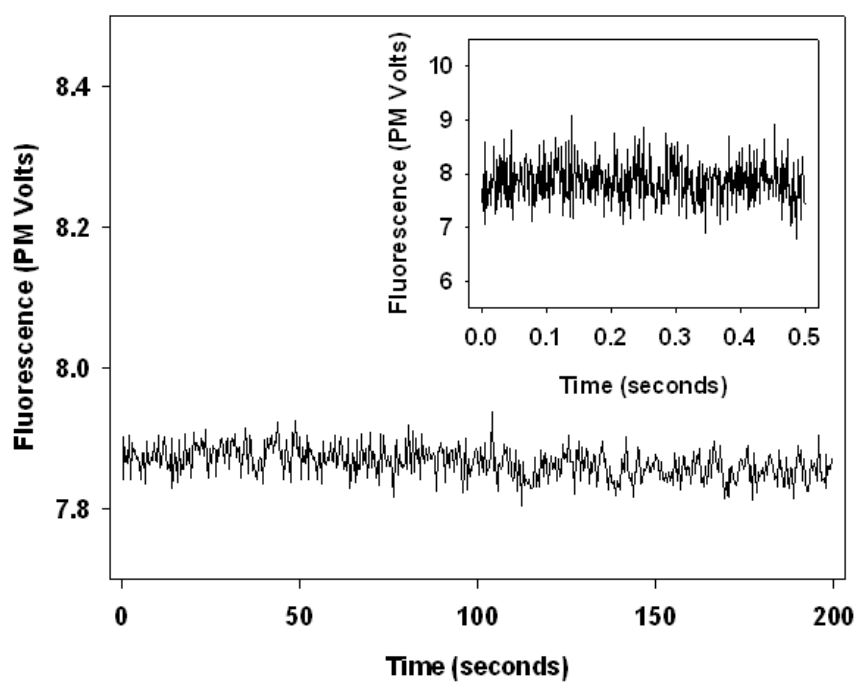

**Figure S7.** Reaction progress curves showing the changes in fluorescence during the reaction between N80D-GpdQ and the substrate *bp*NPP. *Main figure:* 5  $\mu$ M N80D-GpdQ was reacted with 1.1 mM *bp*NPP and the progress was monitored over 200 s. *Inset:* 5  $\mu$ M N80D-GpdQ was reacted with 120  $\mu$ M *bp*NPP and fluorescence changes were monitored over 500 ms.
